# Supplementary material for: The impact of the COVID-19 pandemic on Italian population-based cancer screening activities and test coverage: Results from national cross-sectional repeated surveys in 2020
Source: eLife. 2023 Feb 3;12:e81804. doi: 10.7554/eLife.81804 (PMC9934859; doi:10.7554/eLife.81804)
Supplement: Supplementary file 1. — Cervical cancer screening invitation and examination coverage 2017–2020 in Italy. [file elife-81804-supp1.xlsx]

## Sheet: Exams by period
Cervical screening
Exams
	Jan-May 2020	Jan-May 2019	Jan-May 2020			Jun-Sept 2020			Oct-Dec 2020			2020			Jan-May 2021
North	-186085	324023	-0.574295	-101455	224445	-0.452027	-63206	215617	-0.29314	-350746	764085	-0.459041	-58346	324023	-0.180067	-409092	1.08811e+06	-0.375966
Centre	-82046	162448	-0.50506	-29187	104706	-0.278752	-11821	124427	-0.0950035	-123054	391581	-0.314249	-13339	162448	-0.0821124	-136393	554029	-0.246184
South-Islands	-92061.7	162658	-0.565984	-45439.3	110326	-0.411863	-58441	114423	-0.510745	-195942	387407	-0.505778	-34852.7	162658	-0.21427	-239275	564711	-0.423712
Italy	-360193	649129	-0.554886	-176081	439477	-0.400661	-133468	454467	-0.29368	-669742	1543073	-0.434031	-106538	649129	-0.164124	-784760	2.20685e+06	-0.355602

## Sheet: Examination Coverage
Cervical screening
Examination coverage
	North	Centre	South-Islands	Italy
2017	0.49258	0.405262	0.221621	0.380843
2018	0.4846	0.4406	0.2316	0.3879
2019	0.444	0.468	0.258	0.385
2020	0.249888	0.377413	0.120974	0.231404

## Sheet: Invitations by period
Cervical screening
Invitations
	Jan-May 2020	Jan-May 2019	Jan-May 2020			Jun-Sept 2020			Oct-Dec 2020			2020			Jan-May 2021
North	-307979	638131	-0.482626	-177858	462533	-0.384531	-85228	377378	-0.225843	-571065	1478042	-0.386366	-101006	638131	-0.158284	-672071	2.11617e+06	-0.317588
Centre	-149056	434684	-0.342907	-79769	253983	-0.314072	107232	245485	0.436817	-121593	934152	-0.130164	-36080	434684	-0.0830028	-157673	1368836	-0.115188
South-Islands	-220548	551765	-0.399714	-199674	453269	-0.440519	-166728	457602	-0.364352	-606432	1501751	-0.403817	-117386	551765	-0.212746	-723818	2.05352e+06	-0.352477
Italy	-677583	1.62458e+06	-0.417082	-457301	1.16979e+06	-0.390927	-144724	1080465	-0.133946	-1299090	3913945	-0.331913	-254472	1.62458e+06	-0.156639	-1.55356e+06	5.53852e+06	-0.280501

## Sheet: Invitation coverage
Cervical screening
Invitation coverage
		North	Centre	South-Islands	Italy
	2017	0.896317	1.04924	0.762862	0.881049
	2018	0.900038	1.15024	0.725815	0.890358
	2019	0.828521	1.14009	0.82802	0.891232
	2020	0.5282	1.0682	0.5586	0.6471
