# Supplementary material for: The impact of the COVID-19 pandemic on Italian population-based cancer screening activities and test coverage: Results from national cross-sectional repeated surveys in 2020
Source: eLife. 2023 Feb 3;12:e81804. doi: 10.7554/eLife.81804 (PMC9934859; doi:10.7554/eLife.81804)
Supplement: Supplementary file 2. — Breast cancer screening invitation and examination coverage 2017–2020 in Italy. [file elife-81804-supp2.xlsx]

## Sheet: Exams by period
Breast cancer screening
Exams
	Jan-May 2020	Jan-May 2019	Jan-May 2020			Jun-Sept 2020			Oct-Dec 2020			2020			Jan-May 2021
North	-268754	501874	-0.535501	-86640.1	336706	-0.257317	-66163	324450	-0.203924	-421557	1163030	-0.362464	-17187.1	501874	-0.0342459	-438744	1.6649e+06	-0.263525
Centre	-103770	197234	-0.526126	-22612	118799	-0.190338	-13488	136654	-0.0987018	-139870	452687	-0.308977	-14913	197234	-0.0756107	-154783	649921	-0.238157
South-Islands	-91704.4	166291	-0.551468	-40072.6	101442	-0.395031	-60360	116755	-0.51698	-192137	384488	-0.499722	-31301.7	166292	-0.188234	-223439	550780	-0.405677
Italy	-464228	865399	-0.536432	-149325	556947	-0.268113	-140011	577859	-0.242293	-753564	2000205	-0.376743	-63401.8	865400	-0.073263	-816966	2.8656e+06	-0.285094

## Sheet: Examination Coverage
Breast cancer screening
Examination coverage
	North	Centre	South-Islands	Italy
2017	0.618975	0.498675	0.244538	0.463659
2018	0.614354	0.50597	0.220947	0.455864
2019	0.613216	0.515821	0.212233	0.456514
2020	0.397892	0.38417	0.118747	0.299819

## Sheet: Invitations by period
Breast cancer screening
Invitations
	Jan-May 2020	Jan-May 2019	Jan-May 2020			Jun-Sept 2020			Oct-Dec 2020			2020			Jan-May 2021
North	-421430	816127	-0.516377	-101297	607333	-0.16679	-68681	461388	-0.148857	-591408	1884848	-0.31377	36402.5	816127	0.044604	-555005	2.70098e+06	-0.205483
Centre	-137991	391072	-0.352853	-46579	236719	-0.196769	98635	220437	0.447452	-85935	848228	-0.101311	-18157	391072	-0.0464288	-104092	1239300	-0.0839926
South-Islands	-141588	468476	-0.302232	-102827	240752	-0.427107	-61746.5	250024	-0.246963	-306162	959252	-0.319167	-102870	468476	-0.219585	-434256	1.45295e+06	-0.298879
Italy	-701009	1.67568e+06	-0.418344	-250703	1.0848e+06	-0.231105	-31792.5	931848	-0.0341177	-983505	3692328	-0.266364	-84624.7	1.67568e+06	-0.0505019	-1.09335e+06	5.39323e+06	-0.202727

## Sheet: Invitation coverage
Breast cancer screening
Invitation coverage
		North	Centre	South-Islands	Italy
	2017	98.62	94.32	59.53	84.07
	2018	98.24	96.18	58.52	84.06
	2019	101.69	98.55	66.35	89.05
	2020	67.2241	86.6793	42.2544	62.6294
