# Supplementary material for: The impact of the COVID-19 pandemic on Italian population-based cancer screening activities and test coverage: Results from national cross-sectional repeated surveys in 2020
Source: eLife. 2023 Feb 3;12:e81804. doi: 10.7554/eLife.81804 (PMC9934859; doi:10.7554/eLife.81804)
Supplement: Supplementary file 3. — Colorectal cancer screening invitation and examination coverage 2017–2020 in Italy. [file elife-81804-supp3.xlsx]

## Sheet: Exams by period
Colorectal cancer screening
Exams
	Jan-May 2020	Jan-May 2019	Jan-May 2020			Jun-Sept 2020			Oct-Dec 2020			2020			Jan-May 2021
North	-419696	714242	-0.58761	-229831	500607	-0.459105	-63709	365166	-0.174466	-713236	1580015	-0.451411	-86865	714242	-0.121618	-800101	2294257	-0.348741
Centre	-153649	254349	-0.604087	-63131	177371	-0.355926	-10425	134178	-0.0776953	-227205	565898	-0.401495	13787	254349	0.054205	-213418	820247	-0.260187
South-Islands	-43629	89484.2	-0.487561	-63047.8	102102	-0.617499	-65568.2	87172	-0.752171	-172245	278758	-0.617902	-10223.2	89484.2	-0.114246	-182468	368242	-0.495511
Italy	-616974	1.05808e+06	-0.58311	-356010	780080	-0.456376	-139702	586516	-0.23819	-1112686	2424671	-0.458902	-83301.2	1.05808e+06	-0.078729	-1.19599e+06	3.48275e+06	-0.343403

## Sheet: Examination Coverage
Colorectal cancer screening
Examination coverage
	North	Centre	South-Islands	Italy
2017	0.427333	0.336408	0.114766	0.297985
2018	0.430131	0.345421	0.130668	0.306167
2019	0.41994	0.331854	0.113308	0.295794
2020	0.239906	0.229949	0.0450207	0.170355

## Sheet: Invitation by period
																		-0.244456
Colorectal cancer screening
INVITATIONS
	Jan-May 2020	Jan-May 2019	Jan-May 2020			Jun-Sept 2020			Oct-Dec 2020			2020			Jan-May 2021
North	-743371	1430563	-0.519635	-411792	1024904	-0.401786	-20706	730732	-0.028336	-1175869	3186199	-0.369051	-123031	1430563	-0.0860018	-1298900	4616762	-0.281344
Centre	-318271	763790	-0.4167	-94713	519888	-0.18218	160239	320500	0.499966	-252745	1604178	-0.157554	77692	763790	0.101719	-175053	2367968	-0.0739254
South-Islands	-275355	545161	-0.505089	-119015	322035	-0.369571	-132841	341063	-0.389492	-527211	1208259	-0.436339	-13680	545161	-0.0250935	-701365	1913894	-0.36646
Italy	-1.337e+06	2739514	-0.488042	-625520	1.86683e+06	-0.335071	6691.75	1.3923e+06	0.00480627	-1955825	5998636	-0.326045	-59019	2739514	-0.0215436	-2175318	8898624	-0.244456
ITALIA SENZA PUGLIA

## Sheet: Invitation coverage
	Colorectal cancer screening
	Invitation coverage
		North	Centre	South-Islands	Italy
	2017	85.0281	95.5742	48.317	73.8512
	2018	86.7813	95.8503	44.1778	73.0509
	2019	84.2245	95.5271	43.4974	72.3932
	2020	53.3079	85.5401	28.0034	51.0952
