# Supplementary material for: The impact of the COVID-19 pandemic on Italian population-based cancer screening activities and test coverage: Results from national cross-sectional repeated surveys in 2020
Source: eLife. 2023 Feb 3;12:e81804. doi: 10.7554/eLife.81804 (PMC9934859; doi:10.7554/eLife.81804)
Supplement: Supplementary file 4. — Cervical cancer screening: trend of the proportion of the screening target population who declared to have had a test in due time, overall and by setting of the last test, geographical macro area, education, and economic difficulties. [file elife-81804-supp4.xlsx]

## Sheet: Ita_DeFu
Execution of a test for the early diagnosis of cervical tumors within the recommended time frame – PASSI 2008-2020
Women 25-64 years old
Year	quarter	Italia	Within screening programmes	Outside the screening programme
2008	gen-08	77.8408	39.2361	38.2566
2008	apr-08	76.4448	36.3917	39.5825
2008	lug-08	75.5501	37.8822	37.0907
2008	ott-08	77.6943	37.47	39.8102
2009	gen-09	74.8608	36.1161	38.2766
2009	apr-09	76.2348	38.1217	37.7925
2009	lug-09	75.3301	37.4122	37.4907
2009	ott-09	74.3943	35.66	38.2802
2010	gen-10	77.1608	38.8461	37.8366
2010	apr-10	76.3848	36.7417	39.0825
2010	lug-10	77.6601	37.4922	39.7507
2010	ott-10	79.4943	38.6	40.5502
2011	gen-11	76.9508	39.0161	37.5566
2011	apr-11	78.3848	38.6117	39.3425
2011	lug-11	79.0901	40.1822	38.4007
2011	ott-11	76.5043	37.55	38.4802
2012	gen-12	78.9008	39.2461	39.2166
2012	apr-12	80.5848	40.4317	39.7425
2012	lug-12	78.8301	40.7522	37.6807
2012	ott-12	77.5843	42.62	34.6202
2013	gen-13	79.9408	44.4161	34.9866
2013	apr-13	79.9448	42.3217	36.9925
2013	lug-13	79.4501	40.3622	38.7207
2013	ott-13	80.5643	46.57	33.4302
2014	gen-14	78.5708	42.7561	35.3666
2014	apr-14	77.3148	43.1617	33.7225
2014	lug-14	77.2701	42.9422	33.8807
2014	ott-14	79.6243	42.52	36.5602
2015	gen-15	77.9608	43.9661	33.3666
2015	apr-15	79.5948	44.0117	35.1425
2015	lug-15	81.7801	46.6522	34.7507
2015	ott-15	80.3043	46.76	33.1302
2016	gen-16	81.0608	45.5161	34.9866
2016	apr-16	78.3048	46.2117	31.5225
2016	lug-16	80.9101	48.1922	32.2407
2016	ott-16	80.5443	47.48	32.6702
2017	gen-17	79.8008	43.4961	35.8166
2017	apr-17	78.1448	47.8617	29.7425
2017	lug-17	77.6801	45.0622	31.8507
2017	ott-17	79.9543	49.02	30.3102
2018	gen-18	79.5408	47.8461	31.3366
2018	apr-18	80.4348	49.8117	30.1225
2018	lug-18	80.2301	49.6722	30.2007
2018	ott-18	78.9343	47.74	30.8002
2019	gen-19	81.0808	51.9861	28.7666
2019	apr-19	81.2948	53.5817	27.3125
2019	lug-19	81.5101	53.7622	27.3407
2019	ott-19	80.4943	51.31	28.6402
2020	gen-20	80.7608	52.3961	27.9766
2020	apr-20	79.9248	46.7017	32.9325
2020	lug-20	76.0601	46.0022	29.4007
2020	ott-20	76.8443	45.08	31.1802

## Sheet: Macro-areas
Execution of a test for the early diagnosis of cervical tumors within the recommended times by geographical macro-area of residence - PASSI 2008-2020
Women 25-64 years old
Year	quarter	North	Center	South and Island
2008	gen-08	82.6008	86.1078	60.1856
2008	apr-08	83.2508	78.0605	63.543
2008	lug-08	83.7589	79.153	61.3752
2008	ott-08	85.5295	80.8786	61.0163
2009	gen-09	84.2308	84.0178	59.0856
2009	apr-09	85.4508	81.4205	59.123
2009	lug-09	84.4089	79.433	58.7452
2009	ott-09	83.0795	79.9686	57.1863
2010	gen-10	85.6708	79.5178	63.5856
2010	apr-10	86.7308	85.3605	60.843
2010	lug-10	86.1489	84.133	64.6052
2010	ott-10	87.0395	85.3986	67.4963
2011	gen-11	84.6008	83.3078	63.6456
2011	apr-11	85.7608	84.9105	66.673
2011	lug-11	86.2489	87.403	67.6752
2011	ott-11	85.1595	83.5986	62.5863
2012	gen-12	86.4808	86.7378	66.7956
2012	apr-12	86.8208	85.0505	70.143
2012	lug-12	88.1189	88.693	62.7952
2012	ott-12	86.7295	81.9086	66.1863
2013	gen-13	86.7008	85.2478	69.6156
2013	apr-13	87.6808	87.7405	67.303
2013	lug-13	87.2389	87.723	67.1752
2013	ott-13	87.0095	88.8286	69.6863
2014	gen-14	86.5108	83.6978	66.9656
2014	apr-14	85.6808	80.8905	66.173
2014	lug-14	84.1689	83.943	64.1952
2014	ott-14	87.7695	86.4286	68.0763
2015	gen-15	85.4908	84.1778	67.5956
2015	apr-15	87.4908	84.9005	67.323
2015	lug-15	89.1489	83.513	72.8752
2015	ott-15	89.4995	82.6286	69.5363
2016	gen-16	89.0608	85.9978	69.3956
2016	apr-16	86.7208	82.6305	68.433
2016	lug-16	87.9689	84.963	71.4852
2016	ott-16	87.2595	84.0786	72.1263
2017	gen-17	87.3508	84.3978	68.1456
2017	apr-17	88.7808	85.1905	64.583
2017	lug-17	86.9989	82.863	66.9352
2017	ott-17	88.4995	85.9286	71.0263
2018	gen-18	86.3608	85.1278	71.2456
2018	apr-18	86.3308	86.8705	71.543
2018	lug-18	86.7789	86.293	71.3152
2018	ott-18	85.2895	88.4786	67.0063
2019	gen-19	89.2908	89.3278	69.1956
2019	apr-19	89.1408	89.5505	69.893
2019	lug-19	87.9989	87.013	71.3352
2019	ott-19	87.1295	87.8086	71.0463
2020	gen-20	89.0108	86.0478	69.3956
2020	apr-20	84.9008	84.5805	74.043
2020	lug-20	88.2289	85.993	64.4052
2020	ott-20	86.8995	85.9786	69.2563

## Sheet: Education
Execution of a test for the early diagnosis of cervical tumors within the recommended times by level of education PASSI 2008-2020
Women 25-64 years old
Year	Quarter	Low education*	High education§
2008	gen-08	70.2801	83.4965
2008	apr-08	69.7265	81.75
2008	lug-08	68.6467	80.496
2008	ott-08	71.3966	82.6475
2009	gen-09	67.5501	82.4665
2009	apr-09	70.4665	82.54
2009	lug-09	69.2267	81.146
2009	ott-09	68.3866	80.5575
2010	gen-10	67.7401	83.8865
2010	apr-10	66.7465	84.09
2010	lug-10	68.7567	83.596
2010	ott-10	70.1566	86.2675
2011	gen-11	69.8101	82.3865
2011	apr-11	70.2165	82.17
2011	lug-11	69.1067	85.566
2011	ott-11	67.4866	83.3375
2012	gen-12	71.4801	83.4265
2012	apr-12	73.7165	83.12
2012	lug-12	75.2967	81.106
2012	ott-12	69.5666	82.1475
2013	gen-13	74.3401	84.6265
2013	apr-13	72.4065	86.11
2013	lug-13	74.5567	84.216
2013	ott-13	74.2866	84.8375
2014	gen-14	72.1301	84.5465
2014	apr-14	70.3465	83.52
2014	lug-14	69.2567	85.046
2014	ott-14	75.0466	84.1375
2015	gen-15	69.5701	84.4765
2015	apr-15	71.0165	86.35
2015	lug-15	75.0467	87.376
2015	ott-15	71.8666	86.2675
2016	gen-16	70.8401	86.5265
2016	apr-16	66.0265	83.92
2016	lug-16	73.6367	85.156
2016	ott-16	71.7266	85.8175
2017	gen-17	70.3201	82.7565
2017	apr-17	69.8865	84.78
2017	lug-17	66.6367	84.806
2017	ott-17	72.4666	85.2575
2018	gen-18	73.3801	84.7965
2018	apr-18	73.9965	85.32
2018	lug-18	69.3967	85.256
2018	ott-18	70.9466	84.5075
2019	gen-19	68.0201	87.8665
2019	apr-19	71.7265	87.98
2019	lug-19	69.8567	88.076
2019	ott-19	67.2466	86.3875
2020	gen-20	75.7001	84.8465
2020	apr-20	73.5765	83.02
2020	lug-20	67.2067	82.736
2020	ott-20	66.8166	82.8975
*Low education: none or elementary school; middle school
§ High education: high school; university

## Sheet: Economic Diff
Execution of a test for the early diagnosis of cervical tumors within the recommended time frame by perceived economic difficulties – PASSI 2008-2020
Women 25-64 years old
Year	Quarter	Many perceived economic difficulties	Some perceived economic difficulties	No perceived economic difficulties
2008	gen-08	70.5718	74.5783	84.1437
2008	apr-08	65.5762	75.6325	80.9524
2008	lug-08	64.603	74.4608	80.82
2008	ott-08	68.4589	77.2385	81.4239
2009	gen-09	66.6318	71.9383	80.7437
2009	apr-09	67.8162	74.3225	81.2124
2009	lug-09	68.713	72.4408	79.95
2009	ott-09	66.2089	70.7885	79.8639
2010	gen-10	67.2718	74.3283	82.7137
2010	apr-10	68.4662	72.9225	82.6224
2010	lug-10	65.153	75.9308	82.41
2010	ott-10	73.1489	76.5085	84.4539
2011	gen-11	65.3918	75.0883	81.9037
2011	apr-11	74.6862	75.8325	81.9224
2011	lug-11	68.203	77.3108	85.59
2011	ott-11	65.7289	74.7485	82.6239
2012	gen-12	69.3118	79.1083	82.7337
2012	apr-12	72.2262	80.1125	84.6324
2012	lug-12	65.353	82.1308	80.58
2012	ott-12	68.6589	77.6885	82.0239
2013	gen-13	69.9518	80.0183	84.4937
2013	apr-13	67.8862	80.2925	85.0524
2013	lug-13	69.843	79.9908	82.99
2013	ott-13	73.4889	79.9485	84.5839
2014	gen-14	69.9918	78.1483	83.5037
2014	apr-14	68.7762	76.0225	82.4024
2014	lug-14	68.953	74.3408	84.64
2014	ott-14	70.0289	79.6185	84.4339
2015	gen-15	67.8418	76.6283	83.6737
2015	apr-15	68.4562	78.1825	85.4524
2015	lug-15	68.813	81.3208	87.21
2015	ott-15	67.2289	79.8885	85.7139
2016	gen-16	72.1718	78.5883	86.6237
2016	apr-16	67.8862	76.2025	84.0824
2016	lug-16	78.013	78.7908	83.89
2016	ott-16	72.6189	78.1685	85.0939
2017	gen-17	70.3818	78.8283	83.5137
2017	apr-17	68.3062	76.4825	82.9924
2017	lug-17	68.893	74.0608	84.04
2017	ott-17	64.7389	79.3285	85.0239
2018	gen-18	71.1018	76.8583	84.6837
2018	apr-18	71.5162	78.8425	84.2324
2018	lug-18	69.263	78.0008	85.16
2018	ott-18	64.5389	77.0685	83.6439
2019	gen-19	63.2818	78.9083	86.2737
2019	apr-19	64.7362	78.5025	87.5124
2019	lug-19	68.513	78.2508	86.66
2019	ott-19	68.7889	77.2085	85.1639
2020	gen-20	69.4518	79.8783	83.5137
2020	apr-20	61.2662	79.7125	82.4424
2020	lug-20	62.073	71.3208	81.95
2020	ott-20	64.9289	73.2685	81.7639

## Sheet: Last year
Execution of a preventive test for the early diagnosis of cervical tumors within the last year in / out of screening programs, PASSI data 2008-2020
Women 25-64 years old
	within screening programs	outside screening programs
2008	20.35	24.16	44
2009	19.01	22.82	42
2010	18.94	21.59	41
2011	17.86	21.79	40
2012	18.95	21.15	40
2013	20.13	19.5	40
2014	20.15	19.7	40
2015	20.29	18.58	39
2016	20.64	17.29	38
2017	19.92	16.55	37
2018	21.29	15.99	37
2019	22.5	14.75	38
2020	15.96	12.81	29
	-30.4348

## Sheet: ModPoisson
Multivariable Poisson regression model on performing a test for the early diagnosis of cervical tumors within the last year – PASSI 2017-2019 and 2020
Prevalence rate ratios (PRR) with relative 95% confidence interval (95%CI)
Women 25-64 years old
	2017-2019				2020
	PRR	IC95%		p-value	PRR	IC95%		p-value
Age class
25-34	1.04695	0.999137	1.09705	0.054	1.10633	0.962795	1.27126	0.154
35-49	1.09792	1.05896	1.13831	0	1.10287	0.984394	1.23561	0.091
50-64*
Familial status
married or with a partner	1.08615	1.04823	1.12544	0	1.09883	0.987719	1.22244	0.083
alone*
Education
no title/elementary*
middle school	1.24165	1.10933	1.38976	0	1.55742	0.975465	2.48658	0.063
high school	1.41047	1.26231	1.57602	0	1.88962	1.19044	2.99944	0.007
degree	1.58095	1.40969	1.77302	0	2.20926	1.37955	3.53798	0.001
Economic difficulties
many*
some	1.06056	0.995068	1.13037	0.071	1.02593	0.818013	1.2867	0.825
no	1.20039	1.12747	1.27801	0	1.17941	0.943794	1.47384	0.147
citizenship
italian*
foreigner	0.929111	0.871655	0.990355	0.024	1.05862	0.882342	1.27012	0.54
