# Supplementary material for: The impact of the COVID-19 pandemic on Italian population-based cancer screening activities and test coverage: Results from national cross-sectional repeated surveys in 2020
Source: eLife. 2023 Feb 3;12:e81804. doi: 10.7554/eLife.81804 (PMC9934859; doi:10.7554/eLife.81804)
Supplement: Supplementary file 5. — Breast cancer screening: trend of the proportion of the screening target population who declared to have had a test in due time, overall and by setting of the last test, geographical macro area, education, and economic difficulties. [file elife-81804-supp5.xlsx]

## Sheet: Ita_DeFu
Execution of a preventive mammogram for the early diagnosis of breast cancer within the recommended time frame (the last two years) – PASSI 2008-2020
Women 50-69 years old
Year	Quarter	Italy	Within the screening program	Outside the screening program
2008	gen-08	73.4877	54.9671	18.0189
2008	apr-08	70.6499	51.3129	18.8866
2008	lug-08	69.8554	51.6723	17.6831
2008	ott-08	73.7369	54.3776	18.9615
2009	gen-09	69.6977	49.9471	19.1789
2009	apr-09	72.0499	54.1429	17.4366
2009	lug-09	70.3754	52.3723	17.7631
2009	ott-09	67.9869	48.9176	18.5815
2010	gen-10	70.1977	51.4071	18.1589
2010	apr-10	65.8599	46.3129	18.9466
2010	lug-10	72.1054	50.5023	20.6631
2010	ott-10	70.9469	48.7676	21.7315
2011	gen-11	70.0477	49.6671	19.9589
2011	apr-11	70.0699	49.4829	20.2166
2011	lug-11	69.3554	50.1823	18.6431
2011	ott-11	70.4369	49.9076	19.9015
2012	gen-12	72.3777	51.4271	20.5489
2012	apr-12	71.7099	50.3829	20.8666
2012	lug-12	70.0054	49.8923	19.8731
2012	ott-12	69.7169	50.9976	18.2615
2013	gen-13	71.4677	52.8471	18.0589
2013	apr-13	73.0999	53.9029	18.4866
2013	lug-13	72.6954	50.1123	22.1631
2013	ott-13	70.5469	52.4776	17.7515
2014	gen-14	68.0377	48.4771	19.0789
2014	apr-14	71.6099	53.5629	17.5766
2014	lug-14	73.6254	54.2123	18.9931
2014	ott-14	71.9669	53.3876	18.0915
2015	gen-15	68.9277	49.3171	19.1489
2015	apr-15	73.4999	55.7429	17.3466
2015	lug-15	77.1454	58.1423	18.6631
2015	ott-15	74.6469	53.7976	20.5315
2016	gen-16	74.3377	56.3171	17.6089
2016	apr-16	75.5599	54.7429	20.3466
2016	lug-16	73.1454	52.6323	19.9231
2016	ott-16	72.7769	54.4876	17.8515
2017	gen-17	76.8977	55.2471	21.2389
2017	apr-17	73.3699	53.4229	19.5666
2017	lug-17	73.7554	53.9323	19.4931
2017	ott-17	75.9869	55.0976	20.4315
2018	gen-18	75.8777	53.7171	21.9589
2018	apr-18	76.4699	56.6329	19.5866
2018	lug-18	72.4854	55.5723	16.5331
2018	ott-18	75.2169	54.5776	20.3215
2019	gen-19	75.4377	58.0371	16.7789
2019	apr-19	73.8599	55.2629	18.2366
2019	lug-19	74.7354	55.5623	18.7031
2019	ott-19	76.2169	58.3976	17.2115
2020	gen-20	77.4777	58.5071	18.7689
2020	apr-20	73.8399	51.0029	22.3766
2020	lug-20	71.4654	49.7723	21.0631
2020	ott-20	73.8569	53.7176	19.6015

## Sheet: NCS
Execution of a preventive mammogram for the early diagnosis of breast cancer within the recommended time frame (the last two years) by geographical macro-area of residence – PASSI 2008-2020
Women 50-69 years old
Year	Quarter	North	Center	South and Island
2008	gen-08	81.3348	76.5086	55.5633
2008	apr-08	80.5303	70.8385	51.5132
2008	lug-08	79.1428	74.4854	52.2079
2008	ott-08	81.1821	78.1374	52.0257
2009	gen-09	81.6048	76.6286	49.8033
2009	apr-09	82.1903	78.2485	51.3832
2009	lug-09	80.7628	78.5654	49.0879
2009	ott-09	79.2121	74.4574	44.0857
2010	gen-10	82.4548	77.1486	48.0933
2010	apr-10	79.2403	75.4485	44.2232
2010	lug-10	79.1528	78.0854	59.9479
2010	ott-10	80.7721	77.5074	55.1957
2011	gen-11	79.0948	79.0786	52.9433
2011	apr-11	81.6403	76.5485	51.0432
2011	lug-11	80.2628	77.9854	52.7479
2011	ott-11	80.3521	75.9174	56.3057
2012	gen-12	84.0448	79.0186	54.7033
2012	apr-12	82.1603	75.0485	55.2632
2012	lug-12	81.1728	80.8454	50.2279
2012	ott-12	83.2921	77.6174	51.1357
2013	gen-13	80.2848	74.7386	60.3133
2013	apr-13	82.5003	78.8285	59.0932
2013	lug-13	84.6728	75.4154	57.8779
2013	ott-13	81.0821	78.8674	54.5657
2014	gen-14	78.5948	74.2686	52.7133
2014	apr-14	82.0703	73.3585	59.1032
2014	lug-14	82.5628	76.1554	59.0779
2014	ott-14	81.0521	81.9574	57.0157
2015	gen-15	82.4748	73.6086	54.0833
2015	apr-15	81.9803	80.1685	58.9832
2015	lug-15	86.0828	78.3654	65.6279
2015	ott-15	84.9921	77.6374	61.8757
2016	gen-16	82.8548	79.4686	61.4833
2016	apr-16	84.0803	82.0285	64.1732
2016	lug-16	84.2828	80.0854	57.1779
2016	ott-16	82.0021	80.0174	58.8057
2017	gen-17	85.5348	85.9086	58.5733
2017	apr-17	81.9503	82.0985	60.1332
2017	lug-17	83.7428	80.7754	60.5879
2017	ott-17	86.4521	83.0674	65.2057
2018	gen-18	85.3448	79.7586	66.2233
2018	apr-18	85.0903	81.1885	65.1332
2018	lug-18	81.9528	82.2554	58.2779
2018	ott-18	84.0821	79.7074	64.1857
2019	gen-19	84.1548	82.8586	63.3933
2019	apr-19	83.4203	86.0485	58.3832
2019	lug-19	84.3728	82.4054	59.4279
2019	ott-19	84.5321	83.3174	64.5057
2020	gen-20	83.7048	87.4286	65.0733
2020	apr-20	84.9003	82.1885	63.0732
2020	lug-20	83.9128	76.7754	60.5779
2020	ott-20	85.0121	86.1574	64.3657

## Sheet: Education
Execution of a mammogram for the early diagnosis of breast cancer within the recommended time frame (the last two years) by educational level – PASSI 2008-2020
Women 50-69 years old
Year	quarter	Low education*	High education§
2008	gen-08	65.2932	83.8583
2008	apr-08	65.0001	79.4433
2008	lug-08	62.4744	80.6324
2008	ott-08	65.3523	85.4561
2009	gen-09	64.0932	76.9883
2009	apr-09	64.2201	79.8433
2009	lug-09	65.1044	82.1224
2009	ott-09	61.7823	75.3361
2010	gen-10	61.1532	83.1083
2010	apr-10	57.8701	76.6833
2010	lug-10	63.6944	78.9024
2010	ott-10	62.1923	79.6861
2011	gen-11	60.5332	75.0983
2011	apr-11	61.7601	78.8333
2011	lug-11	62.4444	79.0624
2011	ott-11	62.5923	78.5861
2012	gen-12	62.7132	81.0083
2012	apr-12	64.4201	80.3733
2012	lug-12	64.3344	80.2724
2012	ott-12	62.4123	75.6461
2013	gen-13	66.0232	79.9183
2013	apr-13	64.1501	81.4233
2013	lug-13	63.5744	82.3424
2013	ott-13	62.5323	79.9061
2014	gen-14	58.9132	79.9583
2014	apr-14	64.6001	81.8533
2014	lug-14	70.6844	82.0424
2014	ott-14	64.8323	83.7261
2015	gen-15	57.2032	83.0983
2015	apr-15	65.3701	83.0533
2015	lug-15	71.0544	83.8224
2015	ott-15	65.4623	83.5361
2016	gen-16	68.5932	78.3583
2016	apr-16	68.8501	81.8933
2016	lug-16	62.7344	78.7524
2016	ott-16	64.8423	79.6061
2017	gen-17	68.4832	80.9983
2017	apr-17	64.5801	81.7933
2017	lug-17	61.8944	80.3624
2017	ott-17	67.9823	84.3861
2018	gen-18	67.1532	85.6483
2018	apr-18	72.8901	81.4233
2018	lug-18	61.8044	80.1224
2018	ott-18	70.0523	83.6561
2019	gen-19	66.1032	83.5583
2019	apr-19	64.2801	80.2533
2019	lug-19	65.3444	82.0124
2019	ott-19	65.5623	81.4461
2020	gen-20	73.4932	83.6683
2020	apr-20	60.4401	83.8233
2020	lug-20	57.9244	79.7424
2020	ott-20	61.6823	85.0661
*Low education: none or elementary school; middle school
§ High education: high school; university

## Sheet: Economic difficulties
Execution of a mammogram for the early diagnosis of breast cancer within the recommended time frame (the last two years) by perceived economic difficulties – PASSI 2008-2020
Women 50-69 years old
Year	Quarter	Many perceived economic difficulties	Some perceived economic difficulties	No perceived economic difficulties
2008	gen-08	52.6272	73.267	81.8519
2008	apr-08	60.4217	68.8424	77.1028
2008	lug-08	56.3746	68.5198	78.4053
2008	ott-08	55.6165	72.1807	82.46
2009	gen-09	63.6372	66.727	75.0819
2009	apr-09	57.8217	70.3524	79.6828
2009	lug-09	51.3146	70.8098	76.0853
2009	ott-09	55.4765	64.4007	75.39
2010	gen-10	60.5672	62.717	79.6619
2010	apr-10	53.5117	61.2624	76.0128
2010	lug-10	57.4946	68.1798	81.6753
2010	ott-10	55.0365	68.8607	79.15
2011	gen-11	55.5272	67.597	77.2819
2011	apr-11	59.9017	67.0124	76.3928
2011	lug-11	60.7346	67.1598	76.2553
2011	ott-11	58.6265	67.5207	78.6
2012	gen-12	52.8172	72.587	80.4819
2012	apr-12	56.9217	70.8724	78.1728
2012	lug-12	57.4746	68.1298	78.2553
2012	ott-12	62.5365	67.9607	75.57
2013	gen-13	62.6272	69.727	77.7019
2013	apr-13	61.8617	70.7324	81.4528
2013	lug-13	59.4046	67.9298	83.2653
2013	ott-13	58.5865	69.3907	77.54
2014	gen-14	46.5872	68.927	78.3419
2014	apr-14	57.2117	69.1624	80.3328
2014	lug-14	61.5846	73.0698	79.7253
2014	ott-14	59.2965	68.3307	82.1
2015	gen-15	47.0472	67.587	80.8819
2015	apr-15	56.8717	72.1424	81.6028
2015	lug-15	63.9346	76.7698	82.7753
2015	ott-15	57.0965	73.0007	84.01
2016	gen-16	62.7072	73.577	79.2119
2016	apr-16	59.1717	76.2124	81.5528
2016	lug-16	65.8046	69.3098	79.1453
2016	ott-16	63.2865	69.2307	78.97
2017	gen-17	65.1872	75.947	81.2419
2017	apr-17	58.6617	70.7924	80.6428
2017	lug-17	61.1246	71.4798	80.8053
2017	ott-17	60.6265	74.4307	82.43
2018	gen-18	68.9572	70.237	83.1919
2018	apr-18	62.4917	74.6324	81.9128
2018	lug-18	54.4646	69.3698	80.4953
2018	ott-18	61.8165	73.3307	79.85
2019	gen-19	56.8472	71.507	82.8719
2019	apr-19	54.8017	71.9824	80.4928
2019	lug-19	57.0446	71.1798	80.3753
2019	ott-19	61.1765	73.0207	81.57
2020	gen-20	65.8572	74.127	82.1419
2020	apr-20	66.5817	65.9824	79.8228
2020	lug-20	43.7146	68.2298	79.3053
2020	ott-20	47.8365	71.4707	81.41

## Sheet: Last year
Execution of a mammogram for the early diagnosis of breast cancer within the last year in / out of screening programs, PASSI data 2008-2020
Women 50-69 years old
	within screening programs	outside screening programs
2008	31.7	12.24	43.94	44
2009	29.08	11.5	40.58	41
2010	27.08	11.63	38.71	39
2011	27.5	12.03	39.53	40
2012	28.49	11.52	40.01	40
2013	28.97	10.77	39.74	40
2014	28.19	11.14	39.33	39
2015	28.78	10.96	39.74	40
2016	28.49	11.04	39.53	39
2017	28.95	10.73	39.68	40
2018	29.74	10.65	40.39	41
2019	29.16	10.21	39.37	39
2020	23.04	10.96	34	34

## Sheet: ModPoisson
Multivariable Poisson regression model on performing a preventive mammogram within the last year – PASSI 2017-2019 and 2020
Prevalence rate ratios (PRR) with relative 95% confidence interval (95%CI)
Women 50-69 years old
	2017-2019				2020
	PRR	IC95%		p-value	PRR	IC95%		p-value
Age
50-59	1.22549	1.14022	1.31712	0	1.21858	1.00492	1.47766	0.044
60-69*
Familial status
married or with a partner	1.06646	0.986504	1.15291	0.106	1.0107	0.819295	1.24683	0.921
alone*
Education
no title/elementary*
middle school	1.15752	1.02266	1.31016	0.021	1.74321	1.20617	2.51936	0.003
high school	1.27922	1.1283	1.45034	0	1.93144	1.32173	2.8224	0.001
degree	1.41265	1.20913	1.65042	0	1.92457	1.25209	2.95824	0.003
Economic difficulties
many*
some	1.13063	1.00094	1.27713	0.048	1.05251	0.734275	1.50868	0.78
no	1.48054	1.31176	1.67103	0	1.47025	1.02311	2.11281	0.037
citizenship
italians*
foreigners	1.35021	1.14364	1.59409	0	0.628924	0.399769	0.989435	0.045
