# Supplementary material for: The impact of the COVID-19 pandemic on Italian population-based cancer screening activities and test coverage: Results from national cross-sectional repeated surveys in 2020
Source: eLife. 2023 Feb 3;12:e81804. doi: 10.7554/eLife.81804 (PMC9934859; doi:10.7554/eLife.81804)
Supplement: Supplementary file 6. — Colorectal cancer screening: trend of the proportion of the screening target population who declared to have had a test in due time, overall and by setting of the last test, geographical macro area, education, and economic difficulties. [file elife-81804-supp6.xlsx]

## Sheet: Ita_DeFu
Execution of a preventive examination for the early diagnosis of colorectal cancer within the recommended time frame – PASSI 2010-2020
People 50-69 years old
Year	quarter	Italia	Within screening program	Outside screening program
2010	gen-10	34.9678	27.5505	6.51706
2010	apr-10	34.8712	26.2471	7.92981
2010	lug-10	36.2186	27.0739	8.35869
2010	ott-10	38.0224	29.9685	7.53444
2011	gen-11	37.0878	28.9505	7.23706
2011	apr-11	39.4412	30.9071	7.67981
2011	lug-11	38.0986	28.8239	8.27869
2011	ott-11	40.2524	30.7985	8.50444
2012	gen-12	37.5578	30.2805	6.45706
2012	apr-12	40.5012	31.8771	7.96981
2012	lug-12	41.0786	33.6739	6.62869
2012	ott-12	39.9524	32.8685	6.45444
2013	gen-13	41.7378	34.0005	6.94706
2013	apr-13	41.0512	32.2671	8.08981
2013	lug-13	41.7786	33.9639	7.38869
2013	ott-13	43.5424	34.3985	8.05444
2014	gen-14	42.7278	35.0405	7.13706
2014	apr-14	43.4712	35.0171	7.55981
2014	lug-14	43.3286	35.3439	7.20869
2014	ott-14	43.3124	34.7285	7.66444
2015	gen-15	45.6278	36.2105	8.84706
2015	apr-15	45.1312	37.7371	6.87981
2015	lug-15	44.9286	36.5439	7.65869
2015	ott-15	46.8724	39.7585	6.65444
2016	gen-16	46.9978	38.4405	8.00706
2016	apr-16	46.1912	38.4671	7.14981
2016	lug-16	47.3086	37.4839	9.08869
2016	ott-16	46.4224	37.7185	8.01444
2017	gen-17	46.0578	37.3305	8.06706
2017	apr-17	46.3212	38.3171	7.26981
2017	lug-17	45.6786	39.5939	5.73869
2017	ott-17	46.2324	38.4685	7.32444
2018	gen-18	46.0978	37.0405	8.19706
2018	apr-18	50.5012	42.2071	7.71981
2018	lug-18	49.3686	41.9939	6.77869
2018	ott-18	46.5224	38.5385	7.40444
2019	gen-19	48.8978	41.5505	6.65706
2019	apr-19	48.1712	40.0771	7.23981
2019	lug-19	51.2086	42.9339	7.52869
2019	ott-19	51.0624	43.6285	6.90444
2020	gen-20	51.0678	44.0105	6.69706
2020	apr-20	44.3612	37.3571	6.60981
2020	lug-20	40.0386	31.8039	7.56869
2020	ott-20	44.4724	36.2485	7.66444

## Sheet: NCS
Execution of a preventive examination for the early diagnosis of colorectal cancers within the recommended timeframe by geographical macro-area of residence – PASSI 2010-2020
People 50-69 years old
Year	Quarter	North	Center	South and Island
2010	gen-10	53.5568	29.7097	13.5189
2010	apr-10	53.4086	33.9835	14.518
2010	lug-10	54.8147	36.7097	16.7432
2010	ott-10	54.7698	42.3971	16.9799
2011	gen-11	58.0868	38.1097	14.0489
2011	apr-11	60.0586	36.0435	18.088
2011	lug-11	59.2347	40.8897	17.6432
2011	ott-11	60.4898	39.2571	18.8599
2012	gen-12	58.9868	39.7397	14.3389
2012	apr-12	58.5186	38.5135	19.828
2012	lug-12	63.0347	44.7497	17.3432
2012	ott-12	62.1698	43.1871	16.2099
2013	gen-13	61.6068	49.4497	19.4789
2013	apr-13	63.3886	46.4735	16.278
2013	lug-13	62.7647	43.8997	19.6332
2013	ott-13	64.1298	46.2071	21.0999
2014	gen-14	63.1168	43.2597	22.6989
2014	apr-14	64.7486	43.1335	22.458
2014	lug-14	63.3247	41.4697	21.0432
2014	ott-14	62.7898	45.6471	22.6599
2015	gen-15	66.5568	44.7497	28.2989
2015	apr-15	64.0186	50.6535	22.098
2015	lug-15	64.8347	44.4197	25.7132
2015	ott-15	65.6998	46.9071	27.1799
2016	gen-16	67.0968	49.7697	24.7189
2016	apr-16	64.2986	56.3135	26.668
2016	lug-16	67.5347	51.0197	26.4832
2016	ott-16	65.9998	51.8771	24.8099
2017	gen-17	69.0768	46.7797	23.5889
2017	apr-17	65.6586	52.9035	27.098
2017	lug-17	68.0747	52.2397	24.1132
2017	ott-17	69.6398	56.9571	26.2499
2018	gen-18	63.5068	53.3897	30.0489
2018	apr-18	72.0586	55.7735	29.338
2018	lug-18	66.1547	61.9997	28.4632
2018	ott-18	66.0898	53.6171	25.6499
2019	gen-19	68.0268	60.9297	28.5589
2019	apr-19	65.6686	57.3235	29.018
2019	lug-19	66.7247	61.3997	31.0332
2019	ott-19	67.9498	60.6771	31.2499
2020	gen-20	66.3868	66.5297	26.6289
2020	apr-20	66.4286	60.6335	23.308
2020	lug-20	63.5547	57.8697	19.6332
2020	ott-20	65.2098	61.6971	28.2599

## Sheet: Education
Execution of a preventive examination for the early diagnosis of colorectal cancer within the recommended time frame by educational level - PASSI 2010-2020
People 50-69 years old
Year	Quarter	Low education*	High education§
2010	gen-10	34.6841	35.0934
2010	apr-10	33.6662	36.9232
2010	lug-10	35.1079	37.9085
2010	ott-10	38.7818	36.9749
2011	gen-11	36.8241	37.0934
2011	apr-11	38.8062	40.3832
2011	lug-11	37.7879	38.6285
2011	ott-11	39.3518	41.5649
2012	gen-12	34.6641	40.9834
2012	apr-12	40.2362	40.8932
2012	lug-12	40.0879	42.5685
2012	ott-12	39.4818	40.6649
2013	gen-13	40.3041	43.1834
2013	apr-13	38.8562	43.8532
2013	lug-13	41.0779	42.6985
2013	ott-13	42.1518	45.3149
2014	gen-14	40.6641	45.0134
2014	apr-14	40.7362	46.6032
2014	lug-14	42.0379	45.0385
2014	ott-14	40.5718	46.6949
2015	gen-15	41.0341	50.6234
2015	apr-15	42.8562	47.6032
2015	lug-15	43.3779	46.5785
2015	ott-15	44.5118	49.3749
2016	gen-16	43.6341	50.2134
2016	apr-16	43.5662	48.9932
2016	lug-16	45.4279	49.2585
2016	ott-16	43.4318	49.2649
2017	gen-17	44.4141	47.3434
2017	apr-17	42.9262	49.7232
2017	lug-17	41.1179	50.1285
2017	ott-17	42.8618	49.5849
2018	gen-18	41.8741	49.6934
2018	apr-18	47.6562	53.1632
2018	lug-18	45.8179	53.1185
2018	ott-18	42.1318	50.5849
2019	gen-19	45.0941	52.7734
2019	apr-19	46.7762	49.4332
2019	lug-19	46.0479	55.0385
2019	ott-19	47.5318	54.1549
2020	gen-20	52.8641	49.5134
2020	apr-20	38.8362	48.2132
2020	lug-20	34.4379	44.6585
2020	ott-20	38.5018	49.6449
*Low education: none or elementary school; middle school
§ High education: high school; university

## Sheet: DiffEcon
Execution of a preventive examination for the early diagnosis of colorectal cancer within the recommended time frame by perceived economic difficulties – PASSI 2010-2020
People 50-69 years old
Year	Quarter	Many perceived economic difficulties	Some perceived economic difficulties	No perceived economic difficulties
2010	gen-10	27.3359	28.2826	42.5652
2010	apr-10	21.6106	31.0056	43.785
2010	lug-10	22.5894	31.2318	45.8335
2010	ott-10	32.9541	30.4301	46.5563
2011	gen-11	27.8559	31.5226	44.7852
2011	apr-11	25.2606	35.0456	47.825
2011	lug-11	28.0194	31.0218	48.7835
2011	ott-11	29.1741	35.4701	48.9763
2012	gen-12	22.2259	32.6726	48.9052
2012	apr-12	28.8306	37.6056	48.255
2012	lug-12	28.7694	36.5618	51.6435
2012	ott-12	28.9941	36.5201	49.0963
2013	gen-13	33.9859	37.2726	50.0652
2013	apr-13	28.1106	35.9656	53.275
2013	lug-13	27.8194	37.3718	52.0835
2013	ott-13	29.7841	40.7601	52.5363
2014	gen-14	29.3559	36.3326	56.6352
2014	apr-14	29.9906	37.6656	55.695
2014	lug-14	27.7094	39.2218	54.4035
2014	ott-14	27.3841	37.1401	57.2863
2015	gen-15	28.3259	42.0026	56.7652
2015	apr-15	36.0406	38.9856	54.905
2015	lug-15	33.4994	40.3918	53.2135
2015	ott-15	32.3541	41.6401	56.8363
2016	gen-16	34.6759	43.2426	54.1252
2016	apr-16	31.5406	41.8156	55.645
2016	lug-16	34.4794	41.4518	56.5735
2016	ott-16	31.4741	40.6401	55.7263
2017	gen-17	30.9259	38.6326	56.7852
2017	apr-17	35.5906	42.0756	53.395
2017	lug-17	36.9194	37.4518	55.6035
2017	ott-17	34.0641	39.6001	55.4663
2018	gen-18	32.5259	38.0926	55.9752
2018	apr-18	32.8306	43.9456	60.225
2018	lug-18	34.3894	42.9218	58.8835
2018	ott-18	29.4441	40.2301	55.6063
2019	gen-19	30.8259	42.3826	57.8652
2019	apr-19	30.1506	42.4156	57.015
2019	lug-19	32.8194	47.9618	56.3635
2019	ott-19	34.4741	46.0401	57.8063
2020	gen-20	40.9559	47.3126	54.9452
2020	apr-20	32.6906	35.0356	51.475
2020	lug-20	23.9694	35.1618	45.8135
2020	ott-20	26.5941	35.2201	53.4363

## Sheet: Last Year
Examination for the prevention of colorectal tumors within the last year. Italy, PASSI 2010-2020
People 50-69 years old
	Within the screening program	Outside the screening program
2010	17.3	3.5	21
2011	17.96	3.307	21
2012	18.8	3.281	22
2013	19.64	3.538	24
2014	19.73	3.583	24
2015	21.01	3.308	24
2016	20.5	3.229	24
2017	20.25	2.823	23
2018	21.16	3.323	24
2019	21.71	3.099	25
2020	15.78	2.687	19

## Sheet: ModPoisson
Multivariable Poisson regression model on the execution of a preventive examination for the early diagnosis of colorectal cancer within the last year – PASSI 2017-2019 and 2020
Prevalence rate ratios (PRR) with relative 95% confidence interval (95%CI)
People 50-69 years old
	2017-2019				2020
	PRR	IC95%		p-value	PRR	IC95%		p-value
Age class
50-59*
60-69	1.19991	1.13044	1.27365	0	1.1909	1.00681	1.40865	0.041
Gender
uomini*
donne	0.975398	0.921606	1.03233	0.389	1.01346	0.863305	1.18973	0.87
Education
no title/elementary*
middle school	1.12942	1.00994	1.26304	0.033	1.35446	0.93587	1.96028	0.108
high school	1.2425	1.10912	1.39192	0	1.46146	1.00628	2.12253	0.046
degree	1.0745	0.940225	1.22796	0.291	1.60241	1.05757	2.42794	0.026
Economic difficulties
many*
some	1.33522	1.19419	1.49291	0	1.31522	0.942451	1.83544	0.107
no	2.01456	1.80696	2.24601	0	2.05202	1.48722	2.83131	0
citizenship
italians
foreigners*	0.907849	0.770092	1.07025	0.25	1.40139	0.913215	2.15053	0.122
